# Supplementary material
Source: HighWire-hosted journal article supplement (https://qualitysafety.bmj.com/highwire/filestream/160621/field_highwire_adjunct_files/2/bmjqs-2020-012456supp003_data_supplement.pdf)
Supplement: bmjqs-2020-012456supp003_data_supplement.pdf [file bmjqs-2020-012456supp003_data_supplement.pdf]

### Appendix 3

#### Meeting Participants

| Name                                                                                   | Affiliation                                             | Role                                                                                     |
|----------------------------------------------------------------------------------------|---------------------------------------------------------|------------------------------------------------------------------------------------------|
| Teresa Chan, MD, MHPE                                                                  | McMaster University                                     | Assistant Professor, Division of Emergency Medicine                                      |
| James Cooke, MD                                                                        | University of Michigan                                  | Associate Professor, Executive Director Simulation Center, Department of Family Medicine |
| Robert El-Kareh, MD                                                                    | UC San Diego                                            | Assistant Professor, Division of Biomedical Informatics                                  |
| Carolina Fernandez Branson, PhD                                                        | University of Minnesota                                 | Research Associate, Division of General Internal Medicine                                |
| Charles Friedman, PhD                                                                  | University of Michigan                                  | Professor, Learning Health Sciences                                                      |
| Mark L. Graber, MD                                                                     | Society to Improve Diagnosis in Medicine (SIDM)         | Chief Medical Officer, SIDM                                                              |
| Skip Grieser, M.Ed., PhD candidate in organizational learning, performance, and change | Colorado State University                               | Former Air Traffic Controller and crew resource management (CRM) consultant              |
| Lisa Kriederman, BS                                                                    | National Weather Service                                | Incident Meteorologist and Fire Weather Program Leader                                   |
| Andre Kushniruk, PhD                                                                   | University of Victoria                                  | Professor and Director, School of Health Information Science                             |
| Zach Landis-Lewis, MLIS, PhD                                                           | University of Michigan                                  | Assistant Professor, Learning Health Sciences                                            |
| Kathleen Lane, MD                                                                      | University of Minnesota                                 | Assistant Professor, Division of General Internal Medicine                               |
| Justin Lockrem, MD                                                                     | University of North Carolina, Chapel Hill               | Sports Medicine Fellow, Former College Quarterback, Football Coach                       |
| Shawn Mondoux, MD                                                                      | McMaster University                                     | Assistant Professor, Emergency Medicine                                                  |
| Andrew Olson, MD                                                                       | University of Minnesota                                 | Associate Professor of Medicine and Pediatrics                                           |
| Joan Sargeant, PhD                                                                     | Dalhousie University                                    | Professor, Medical Education                                                             |
| Hardeep Singh, MD, MPH                                                                 | Houston Veterans Affairs and Baylor College of Medicine | Professor and Director of Diagnosis Improvement Safety Center                            |
| Divvy Upadhyay, MD, MPH                                                                | Geisenger                                               | Researcher and Scientist, Safer Dx Learning Lab                                          |
| Samreen Vora, MD                                                                       | Children's Hospitals Minnesota                          | Medical Director of Simulation, Emergency Physician                                      |

|                        |                                               |                                                        |
|------------------------|-----------------------------------------------|--------------------------------------------------------|
| Michelle Williams, MHI | University of Michigan                        | Project Manager, Department of Learning Health Systems |
| Daniel Yang, MD        | Gordon and Betty Moore Foundation             | Program Officer                                        |
| Laura Zwaan, PhD       | Erasmus, University Medical Center, Rotterdam | Assistant Professor, Medical Education Research        |
